# Supplementary material for: Circulating tumor DNA integrating tissue clonality detects minimal residual disease in resectable non-small-cell lung cancer
Source: PubMed Central journal article supplement (PMC9526343; doi:10.1186/s13045-022-01355-8), 2022-10-01
Supplement: 13045_2022_1355_MOESM6_ESM.pdf [file 13045_2022_1355_MOESM6_ESM.pdf]

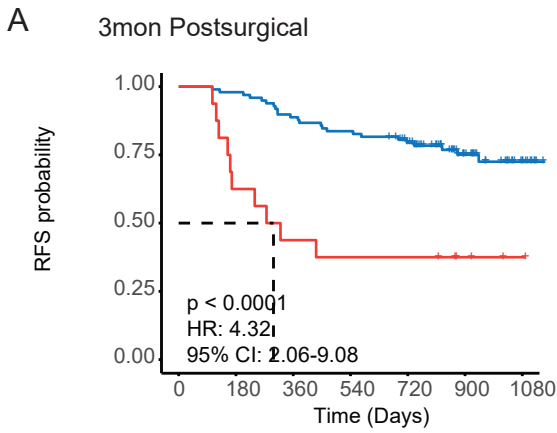

|                |    |    |    |    |    |    |    |
|----------------|----|----|----|----|----|----|----|
| ctDNA-negative | 98 | 96 | 87 | 82 | 72 | 38 | 16 |
| ctDNA-positive | 16 | 10 | 7  | 6  | 6  | 3  | 1  |

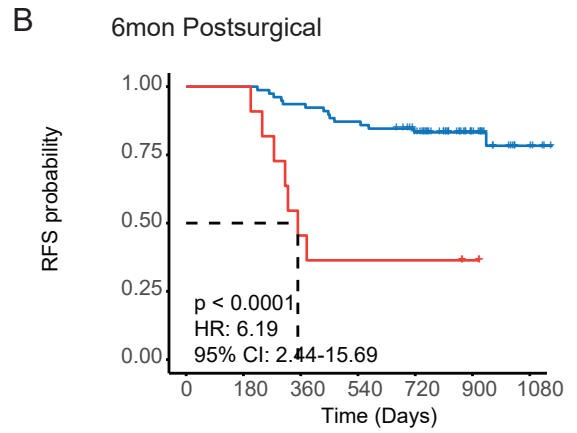

|                |    |    |    |    |    |    |   |
|----------------|----|----|----|----|----|----|---|
| ctDNA-negative | 78 | 78 | 73 | 68 | 59 | 26 | 8 |
| ctDNA-positive | 11 | 11 | 5  | 4  | 4  | 2  | 0 |

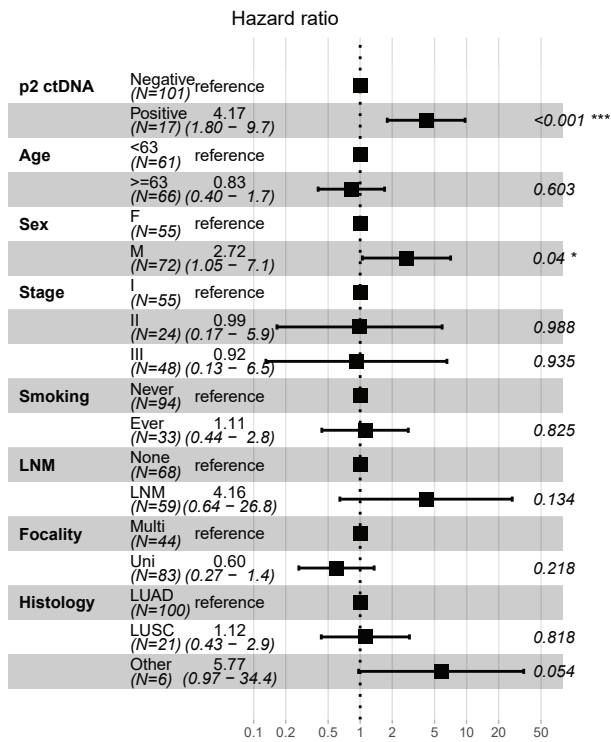

# Events: 34; Global p-value (Log-Rank): 0.00054199  
AIC: 295.68; Concordance Index: 0.75

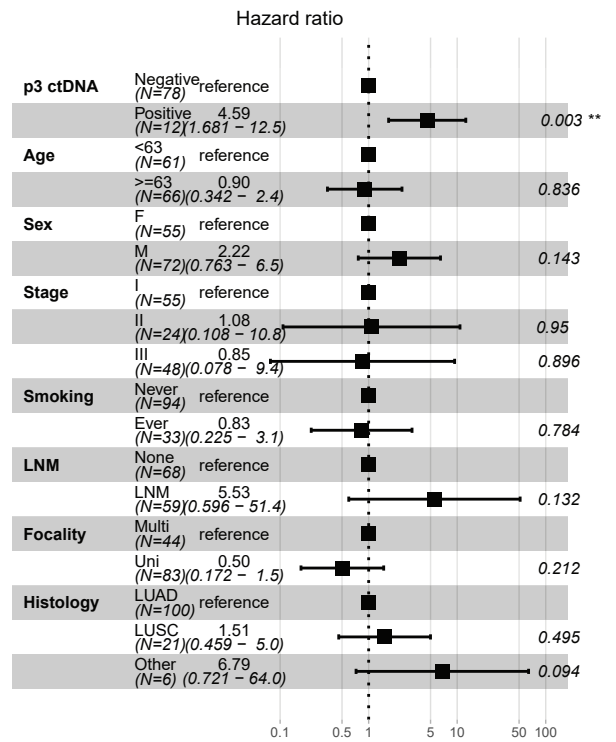

# Events: 21; Global p-value (Log-Rank): 0.0072828  
AIC: 176.32; Concordance Index: 0.8
