# Supplementary material for: Circulating tumor DNA integrating tissue clonality detects minimal residual disease in resectable non-small-cell lung cancer
Source: PubMed Central journal article supplement (PMC9526343; doi:10.1186/s13045-022-01355-8), 2022-10-01
Supplement: 13045_2022_1355_MOESM7_ESM.pdf [file 13045_2022_1355_MOESM7_ESM.pdf]

### LUAD

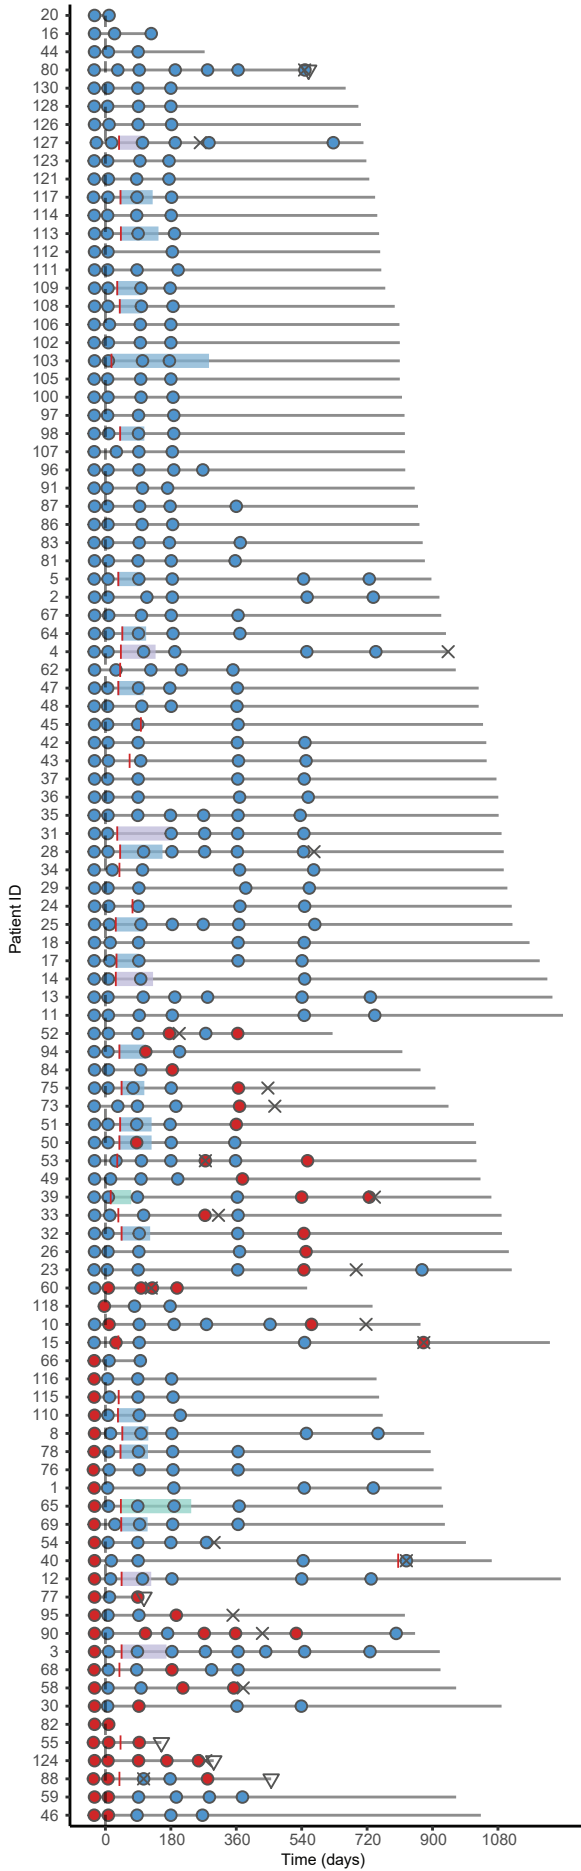

### LUSC

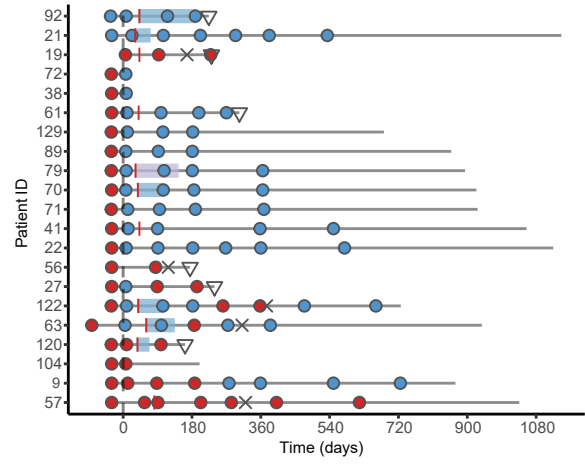

### Other

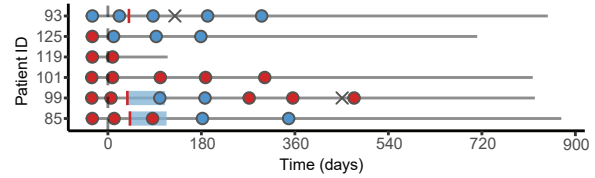

- Event**
- ctDNA-Negative
  - ctDNA-Positive
  - × Relapse
  - ▽ Decease
  - Start of AT
- AT type**
- Chemo
  - Chemo+Radiological
  - Chemo+Targeted
  - Radiological
