# Supplementary material for: Circulating tumor DNA integrating tissue clonality detects minimal residual disease in resectable non-small-cell lung cancer
Source: PubMed Central journal article supplement (PMC9526343; doi:10.1186/s13045-022-01355-8), 2022-10-01

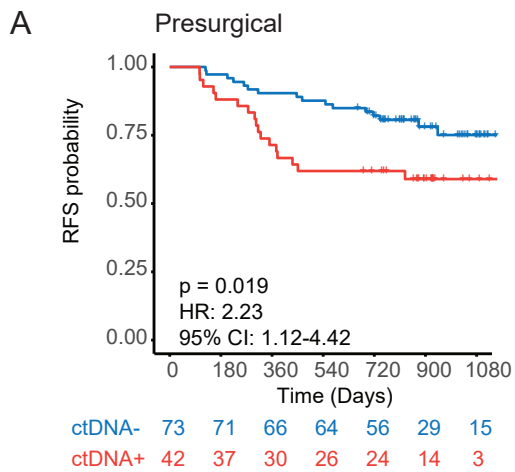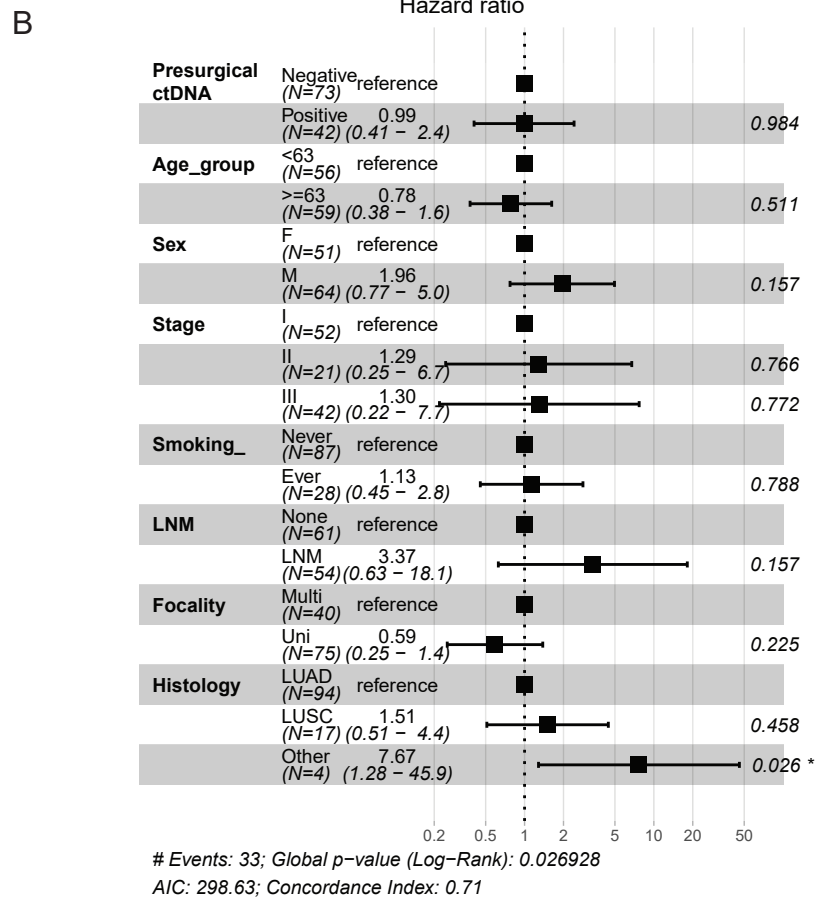

Supplement: 13045_2022_1355_MOESM10_ESM.pdf [file 13045_2022_1355_MOESM10_ESM.pdf]
