# Supplementary material for: Circulating tumor DNA integrating tissue clonality detects minimal residual disease in resectable non-small-cell lung cancer
Source: Springer Nature journal article supplement (doi:10.1186/s13045-022-01355-8), 2022-10-01

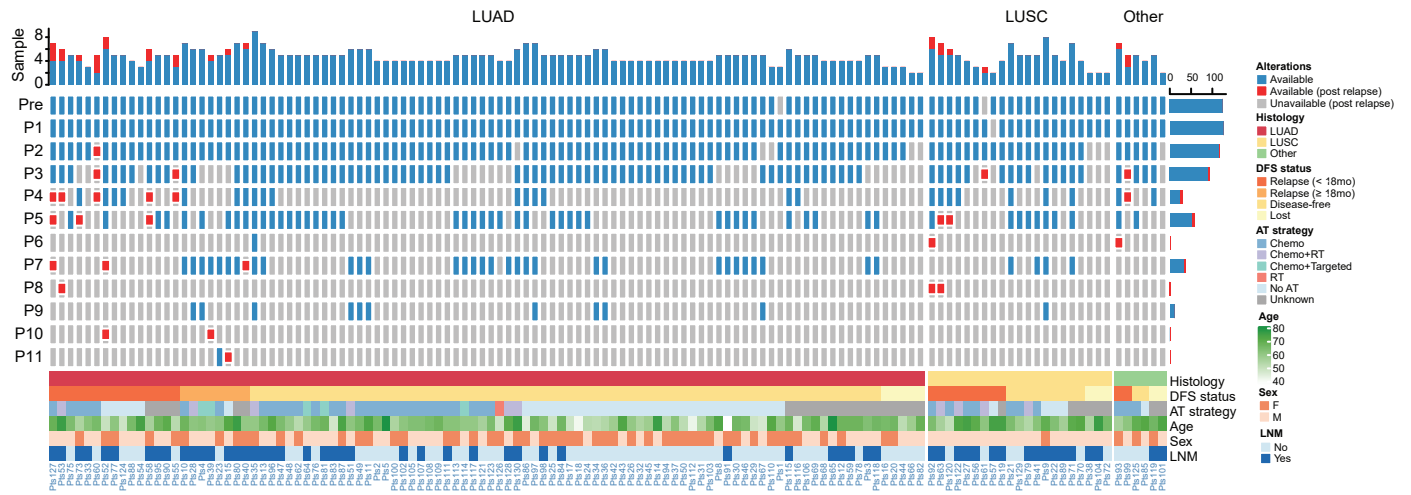

Supplement: MOESM4 [file 23561782]
